# Supplementary material
Source: publisher site journal article supplement (https://www.dovepress.com/article/350954)
Supplement: Supplementary file 1 [file get_supplementary_file.php]

1 **Supplementary Figure legend**

2 **Supplementary Figure 1:** The violin chart of standardized GSE112556 expression  
3 matrix.

4 **Supplementary Figure 2:** The violin chart of standardized GSE29819 expression  
5 matrix.

6 **Supplementary Figure 3:** The violin chart of standardized GSE84796 expression  
7 matrix.

8 **Supplementary Figure 4:** The intersection between miRNA targets and DEMs.

9

**Supplement Figure 1: The violin chart of standardized GSE112556 expression matrix.**

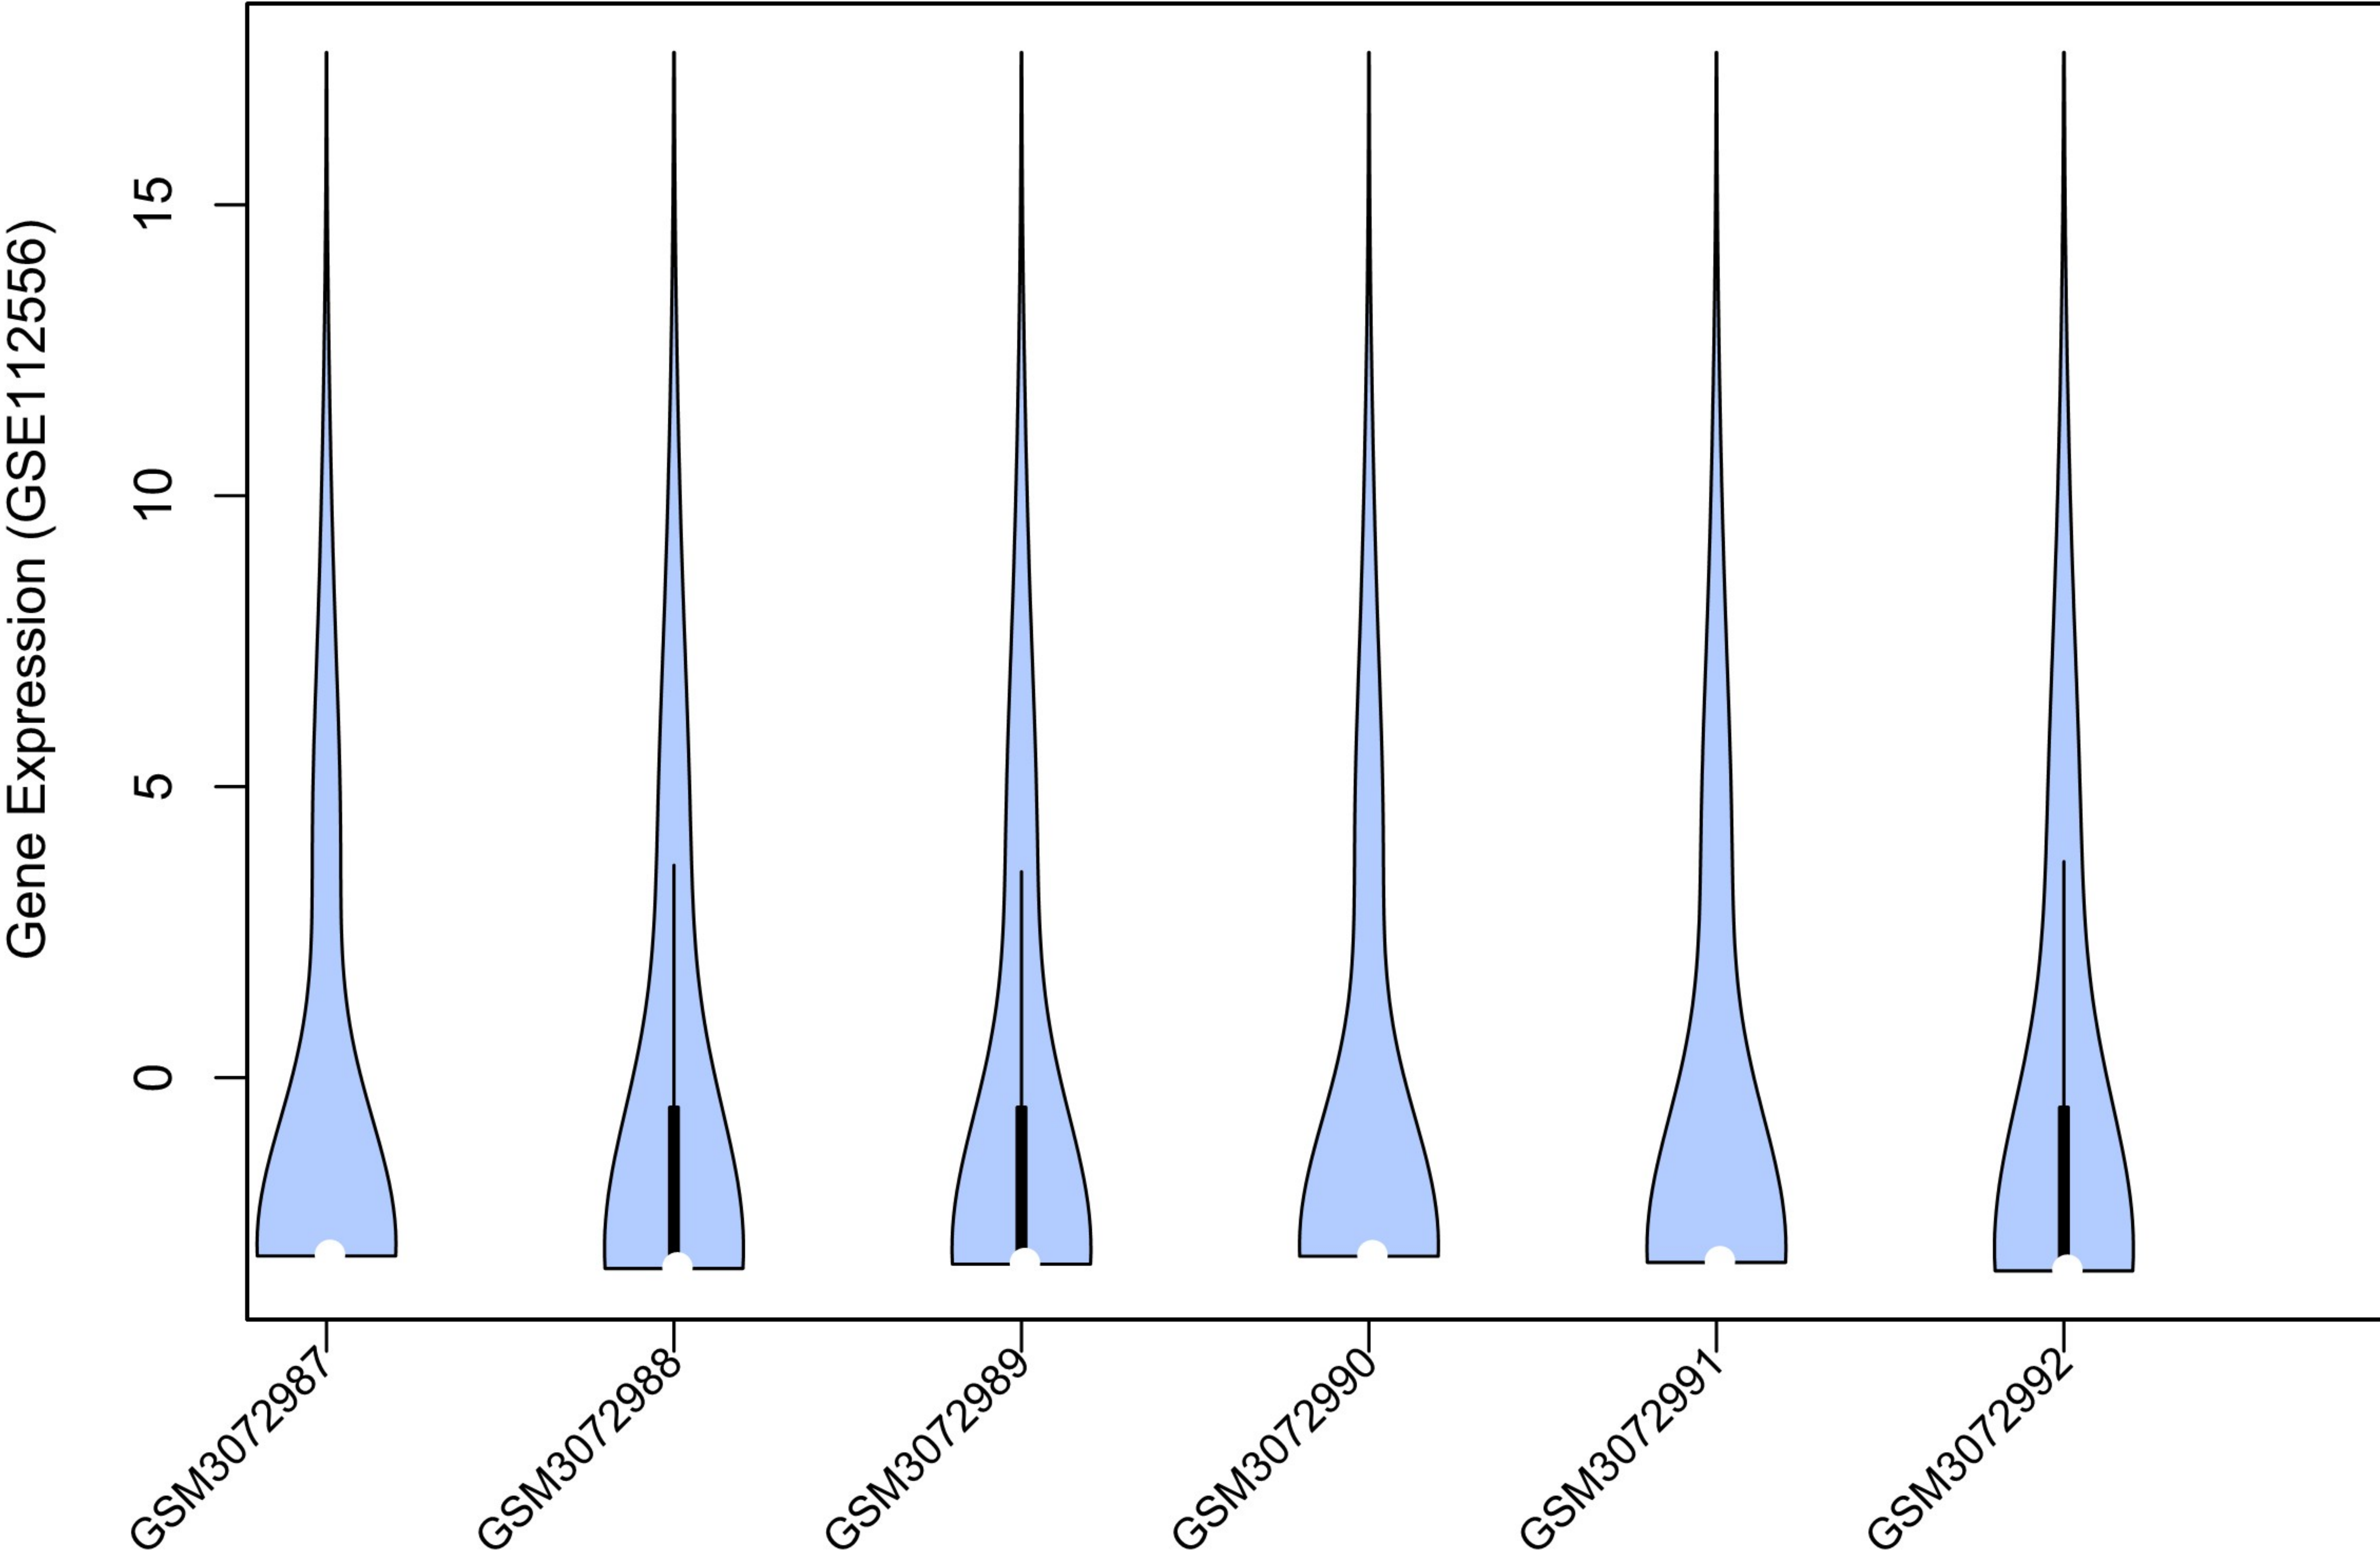

**Supplement Figure 2: The violin chart of standardized GSE29819 expression matrix**

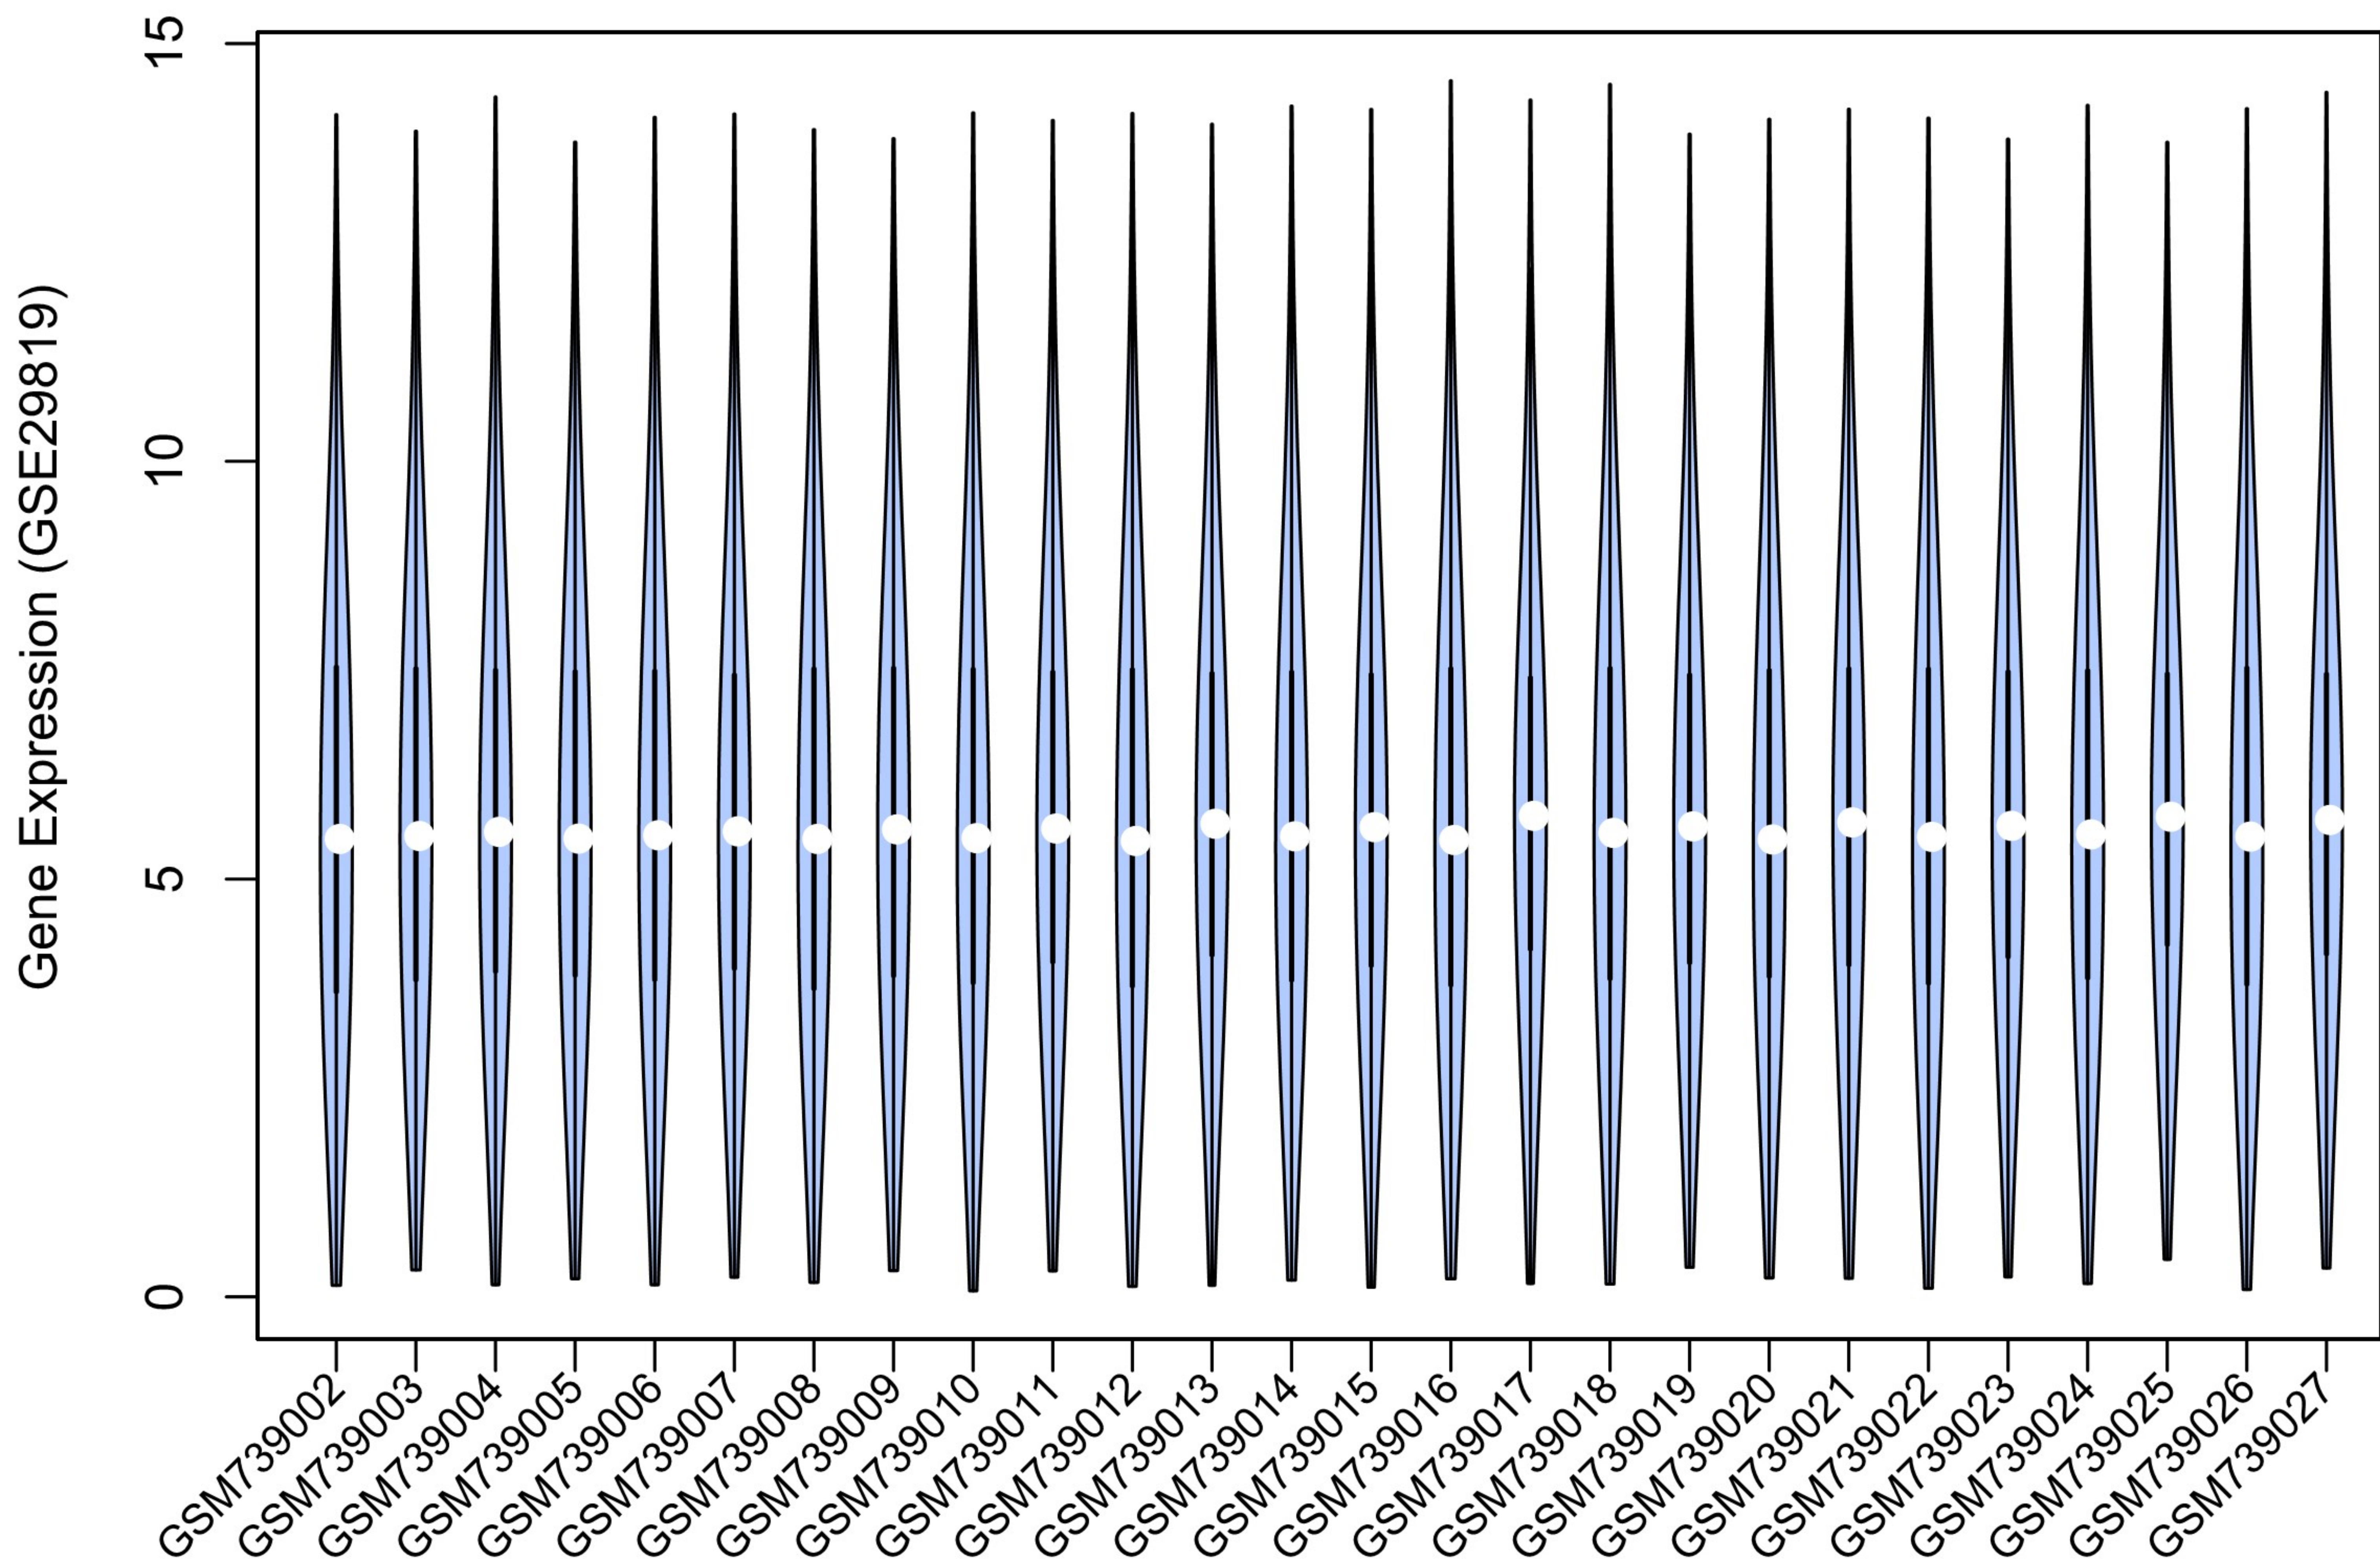

Supplement Figure 3: The violin chart of standardized GSE84796 expression matrix.

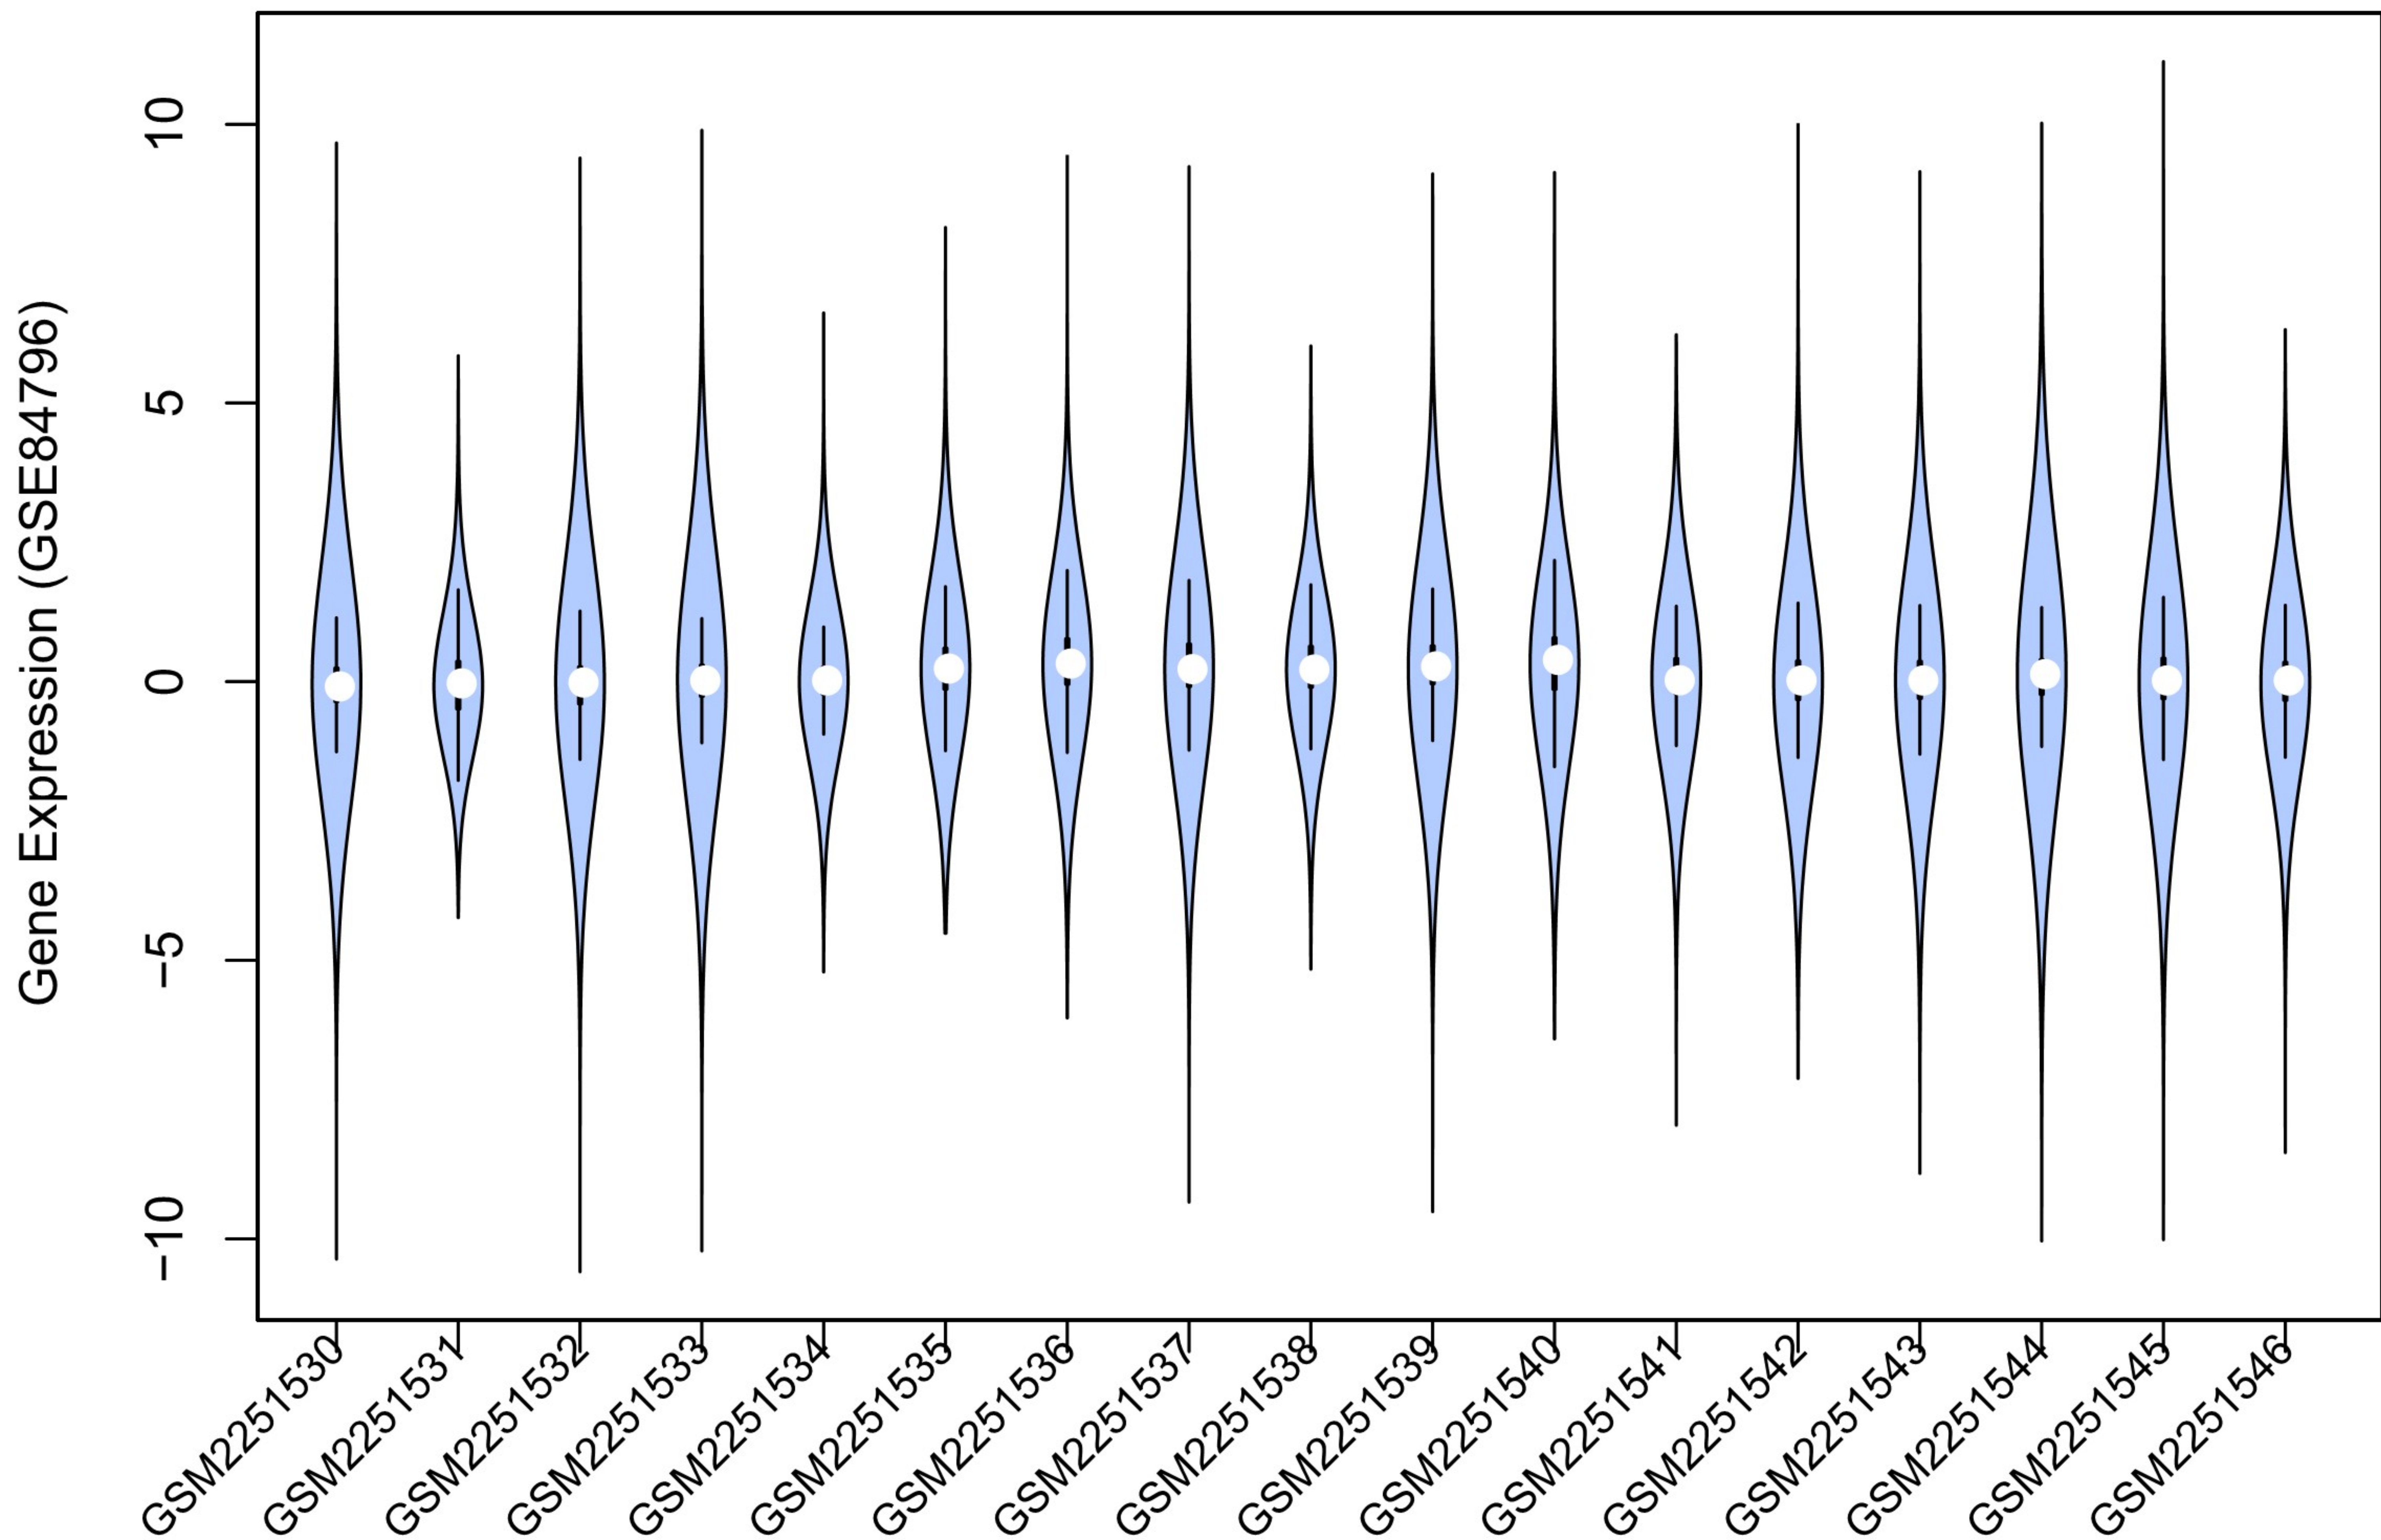

# Supplement Figure 4: The intersection between miRNA targets and DEMs

A

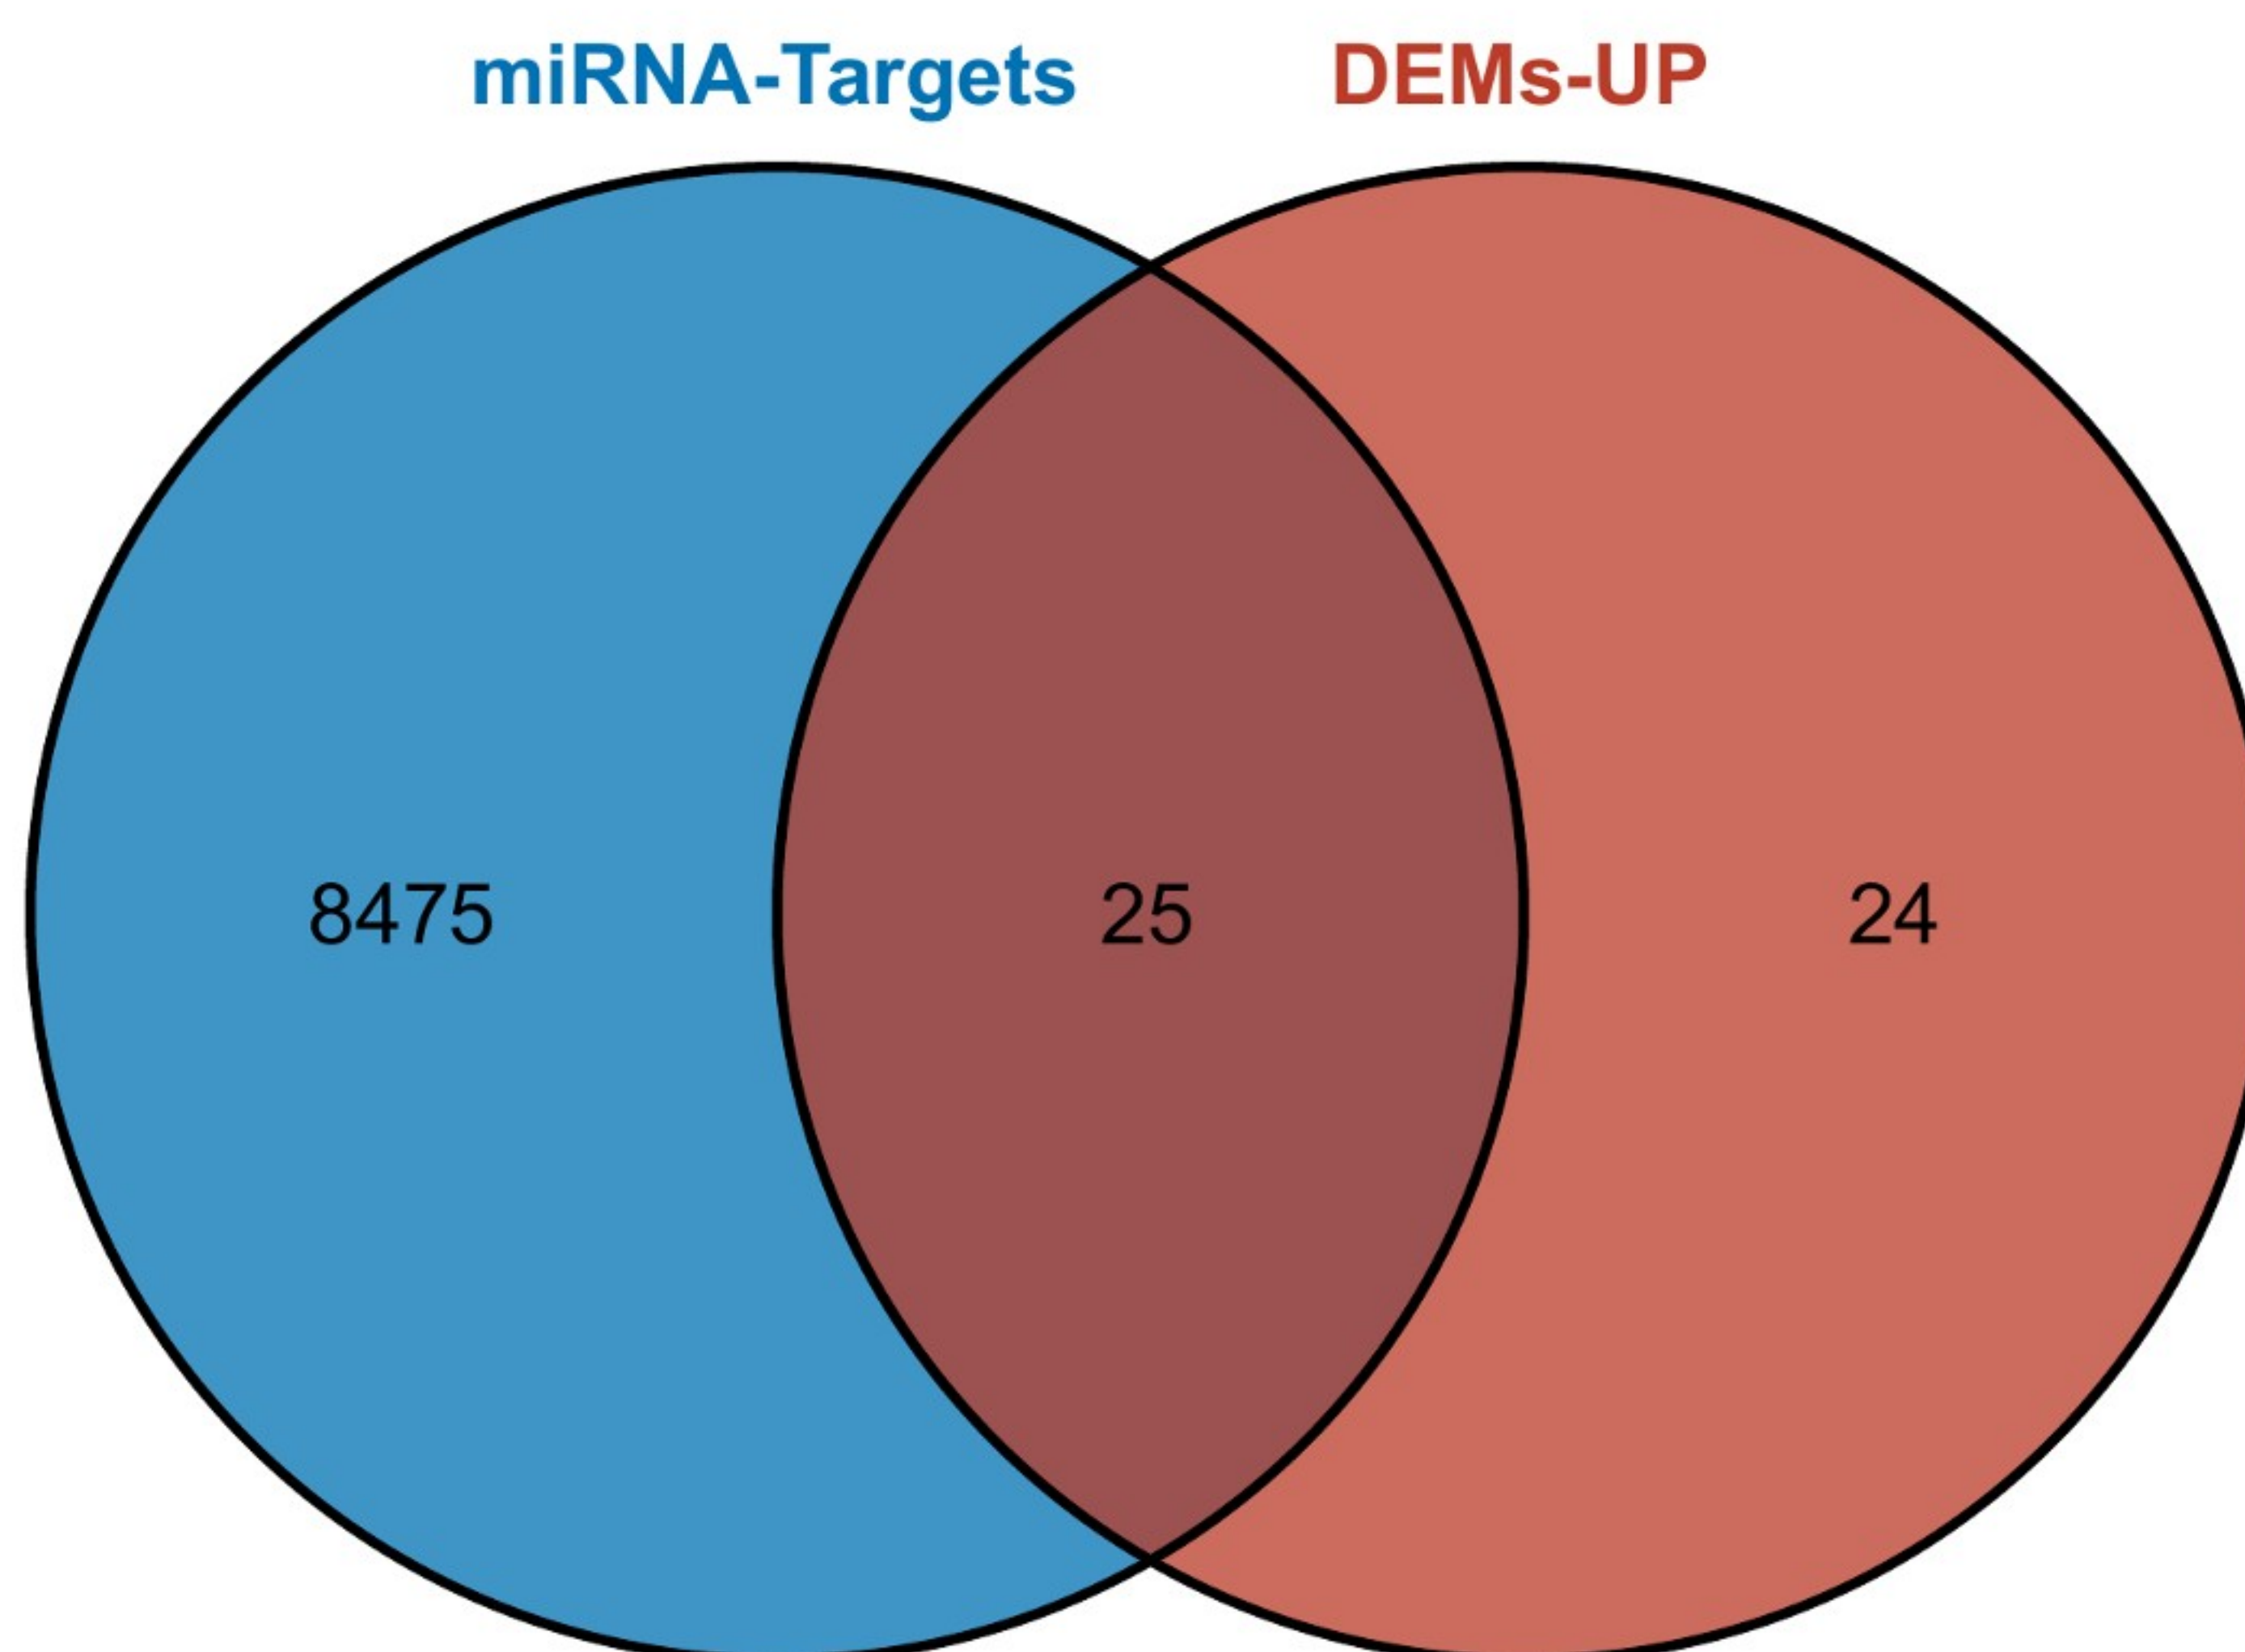

B

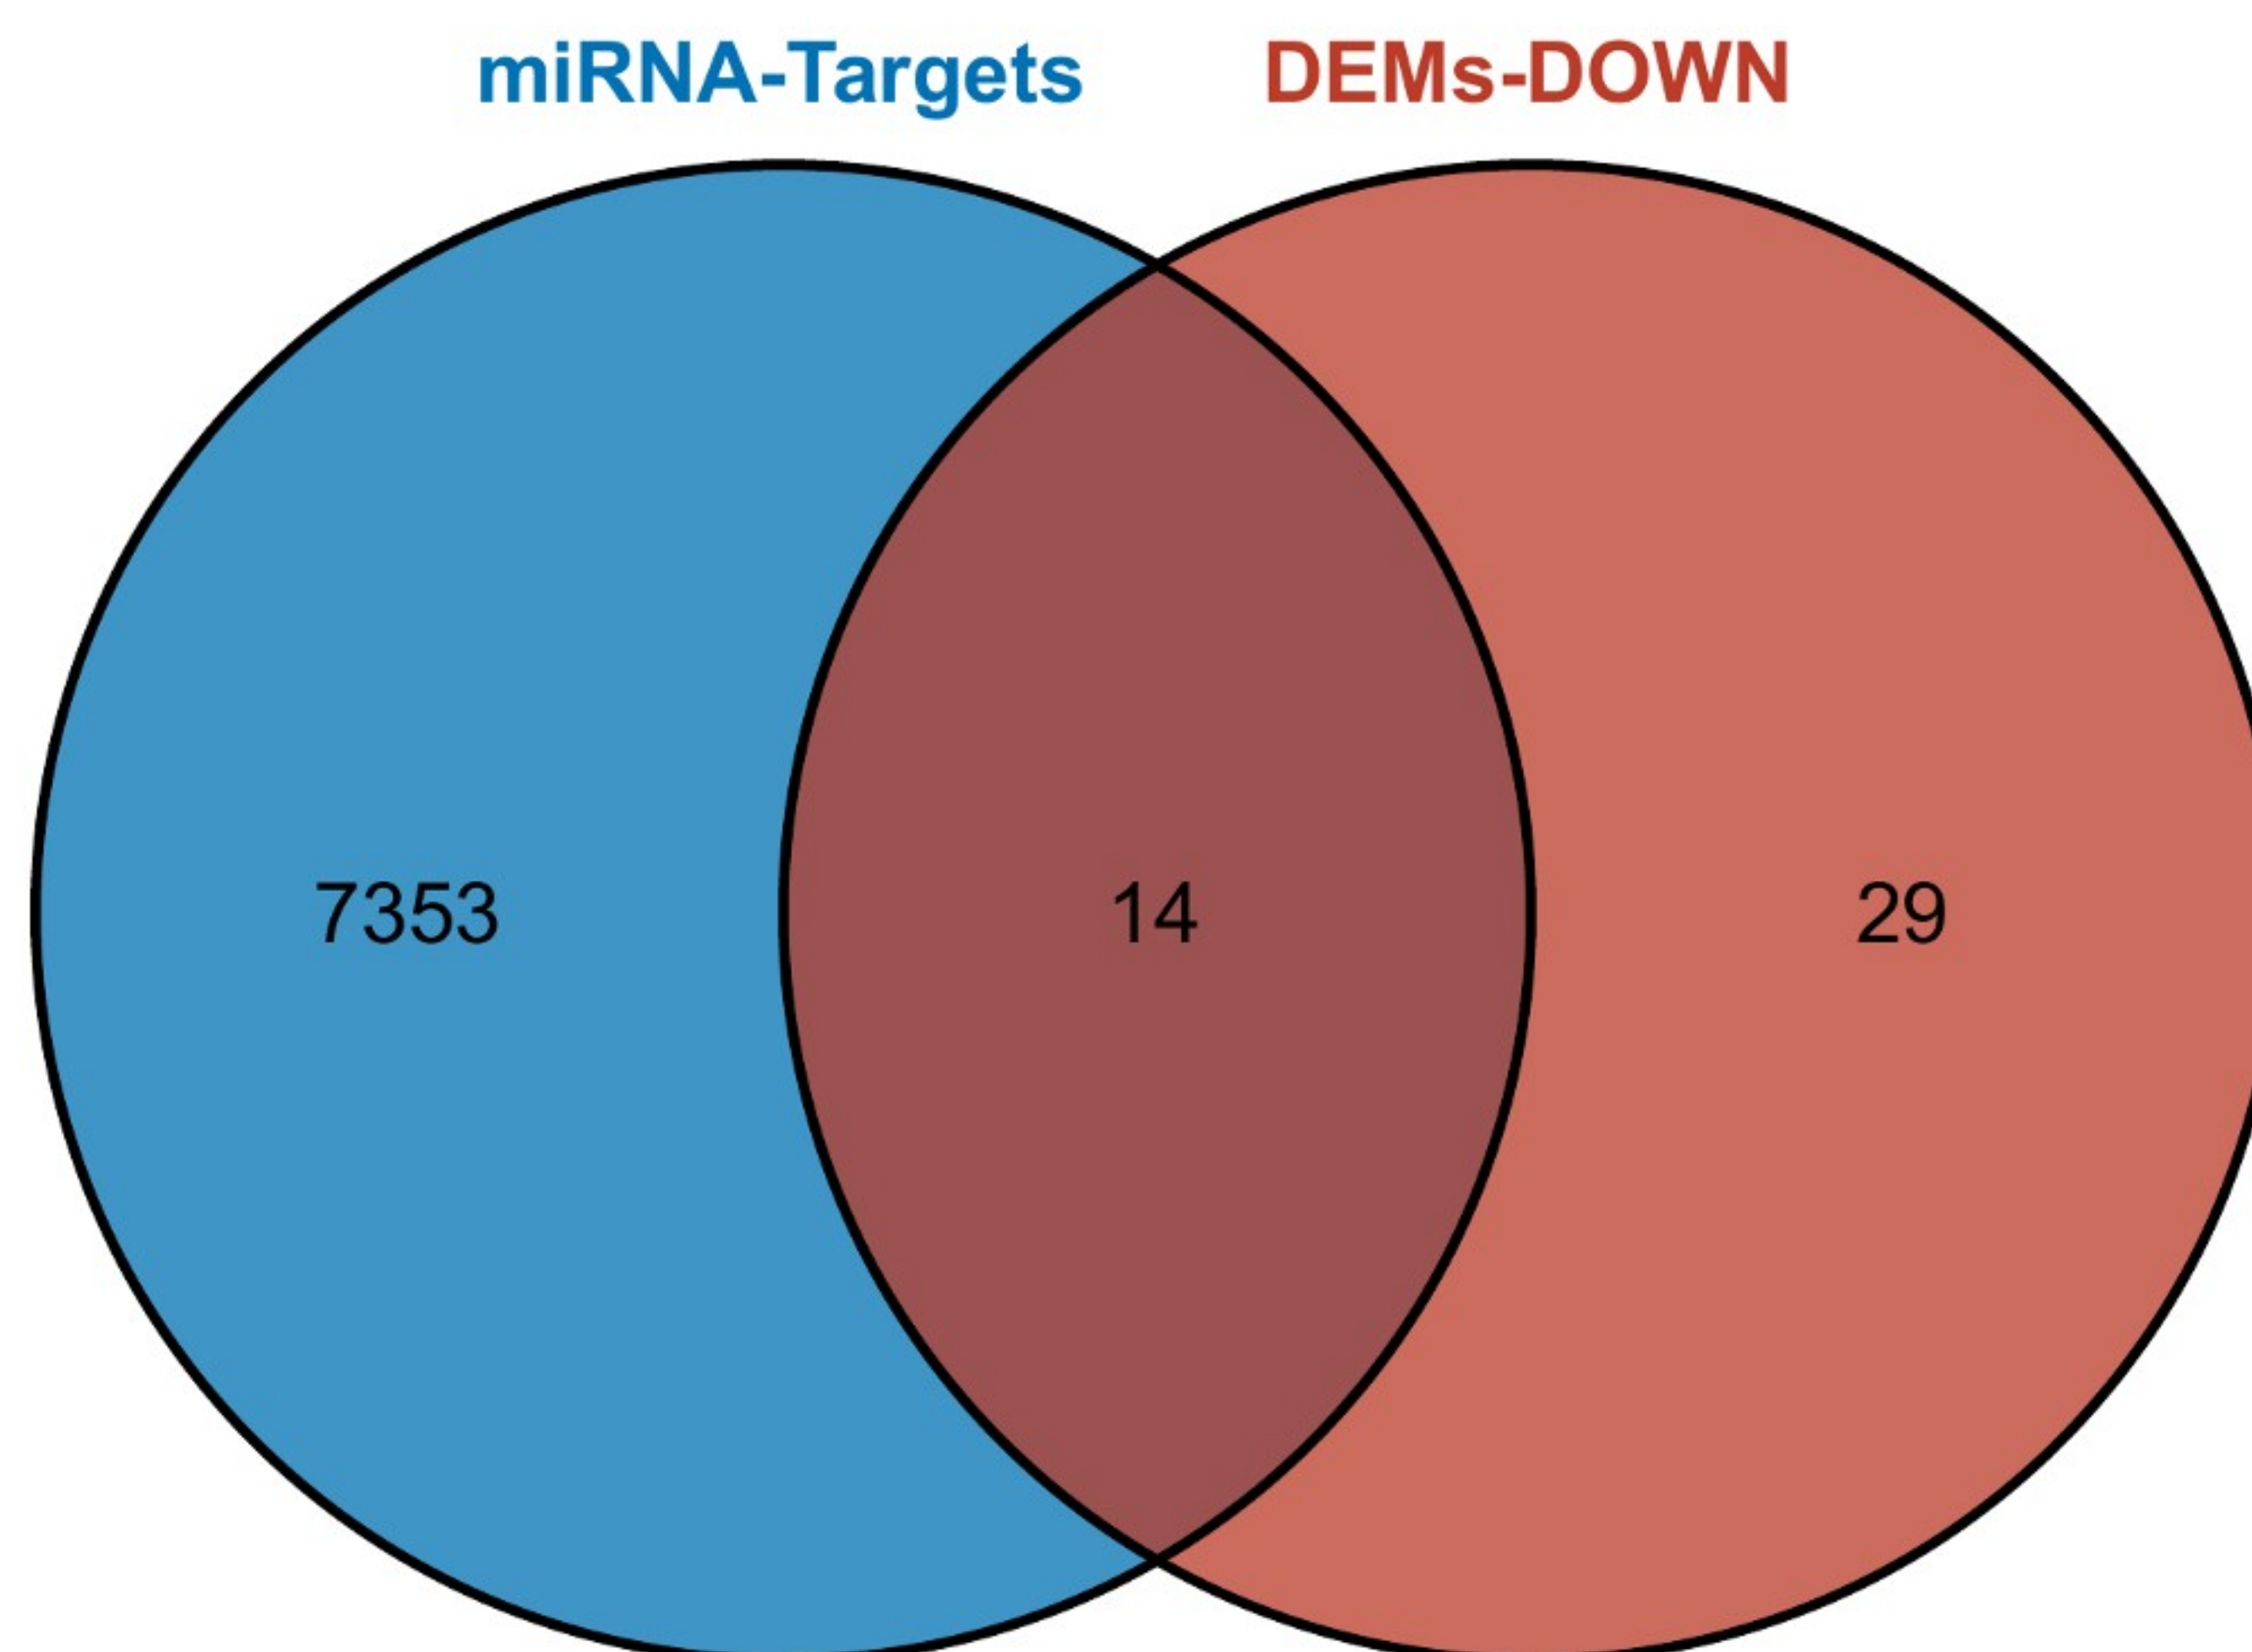

**Supplementary Table 1: The primer sequences of hub gene.**

| <b>Name</b>            | <b>Sequence</b>                                                                  |
|------------------------|----------------------------------------------------------------------------------|
| <b>hsa-miR-363-3p</b>  | 5'- AAUUGCACGGUAUCCAUCUGU -3'                                                    |
| <b>hsa-miR-770-5p</b>  | 5'- AGCACCACGUGUCUGGGCCACG -3'                                                   |
| <b>hsa-miR-551b-5p</b> | 5'- GAAAUCAAGCUUGGGUGAGACCU -3'                                                  |
| <b>CXCR4</b>           | <b>F:</b> 5'- CTGGCTTTCTTTGCCTGCTG -3'<br><b>R:</b> 5'- ACGCTCTCGAACTCACATCC -3' |
| <b>DDIT4</b>           | <b>F:</b> 5'- TCTTGTCCGCAATCTTCGCT -3'<br><b>R:</b> 5'- GGAGGACGAGAAACGATCCC -3' |
| <b>PIK3R1</b>          | <b>F:</b> 5'- CAGGAGCGGTACAGCAAAGA -3'<br><b>R:</b> 5'- GCTGTCGATGATCTCGCTGA -3' |

**Supplement Table 2: Differentially expressed mRNA (DEMs) in GSE29819.**

| Name           | Log2FC   | P value  | Adjusted P value | Name             | Log2FC   | P value  | Adjusted P value |
|----------------|----------|----------|------------------|------------------|----------|----------|------------------|
| <b>SLCO5A1</b> | -1.908   | 3.06E-11 | 3.31E-07         | <b>LOC283861</b> | 1.689819 | 3.81E-05 | 0.001667         |
| <b>OMD</b>     | 1.772609 | 8.63E-10 | 1.70E-06         | <b>FAM179A</b>   | -1.61185 | 4.87E-05 | 0.001966         |
| <b>ZMAT1</b>   | 1.00447  | 2.08E-09 | 2.76E-06         | <b>KCNJ5</b>     | -1.16223 | 5.42E-05 | 0.00211          |
| <b>DDIT4</b>   | 1.960508 | 2.39E-09 | 2.76E-06         | <b>MARVELD2</b>  | -1.23301 | 5.91E-05 | 0.002252         |
| <b>PIK3R1</b>  | 1.918066 | 2.51E-09 | 2.76E-06         | <b>PRRT2</b>     | 1.300242 | 6.55E-05 | 0.002428         |
| <b>FAM167B</b> | -2.94145 | 3.64E-09 | 3.59E-06         | <b>CA14</b>      | -2.24087 | 7.54E-05 | 0.002651         |
| <b>NAP1L3</b>  | 2.485702 | 4.81E-09 | 4.53E-06         | <b>NR4A3</b>     | -2.29632 | 7.68E-05 | 0.002696         |
| <b>TSC22D3</b> | 1.742999 | 5.06E-09 | 4.56E-06         | <b>MRGPRF</b>    | -1.38154 | 7.70E-05 | 0.002697         |
| <b>TUBB2A</b>  | -1.11612 | 2.61E-08 | 1.34E-05         | <b>P2RY2</b>     | -1.33949 | 9.35E-05 | 0.003129         |
| <b>FCN3</b>    | -2.19401 | 3.94E-08 | 1.94E-05         | <b>MNS1</b>      | 1.195385 | 0.0001   | 0.003292         |
| <b>FRZB</b>    | 1.502989 | 4.83E-08 | 2.23E-05         | <b>C16orf89</b>  | 1.364431 | 0.00011  | 0.003502         |
| <b>CHRD1</b>   | 1.875524 | 9.69E-08 | 3.59E-05         | <b>CDCA2</b>     | -1.33106 | 0.000124 | 0.003771         |
| <b>APOBEC2</b> | -1.03543 | 1.38E-07 | 4.46E-05         | <b>C11orf65</b>  | 2.121634 | 0.00017  | 0.004721         |
| <b>FIBIN</b>   | 1.543898 | 1.74E-07 | 5.24E-05         | <b>GNLY</b>      | 1.063166 | 0.000247 | 0.006173         |
| <b>S1PR3</b>   | -1.34437 | 1.94E-07 | 5.61E-05         | <b>MYH6</b>      | -1.28107 | 0.000256 | 0.006347         |
| <b>CHAC2</b>   | -1.44099 | 2.20E-07 | 6.03E-05         | <b>CXCR4</b>     | 1.119103 | 0.000267 | 0.006541         |
| <b>MID1IP1</b> | -1.47554 | 3.04E-07 | 7.32E-05         | <b>GRIK2</b>     | -1.08904 | 0.000282 | 0.006739         |
| <b>ARRDC2</b>  | 1.51437  | 3.94E-07 | 8.52E-05         | <b>LPP-AS2</b>   | 1.241366 | 0.000296 | 0.00701          |
| <b>MAMDC2</b>  | 1.189494 | 6.33E-07 | 0.000111         | <b>RASL11B</b>   | 1.622126 | 0.000301 | 0.007074         |
| <b>CDKN3</b>   | -1.24659 | 6.70E-07 | 0.000112         | <b>LSAMP</b>     | -1.18309 | 0.000386 | 0.008282         |
| <b>SLC36A4</b> | -1.14555 | 7.58E-07 | 0.000121         | <b>PTGDR2</b>    | 1.502804 | 0.000433 | 0.008883         |
| <b>ADRB1</b>   | -1.18372 | 7.78E-07 | 0.000123         | <b>GNMT</b>      | -2.1016  | 0.000781 | 0.013364         |
| <b>ABCC5</b>   | -1.01379 | 1.16E-06 | 0.000161         | <b>ASPN</b>      | 1.230578 | 0.000809 | 0.013561         |
| <b>RRAD</b>    | -1.89416 | 1.32E-06 | 0.000172         | <b>CFH</b>       | 1.142017 | 0.00095  | 0.015195         |
| <b>LPCAT3</b>  | -1.01024 | 1.39E-06 | 0.000177         | <b>FAM83B</b>    | -1.28006 | 0.001003 | 0.015753         |
| <b>LTBP2</b>   | 1.956846 | 2.25E-06 | 0.000243         | <b>S100A3</b>    | -1.54551 | 0.001037 | 0.016051         |
| <b>ABRA</b>    | -1.68942 | 3.61E-06 | 0.000335         | <b>GDF10</b>     | 1.904281 | 0.001077 | 0.016473         |
| <b>LMO3</b>    | 1.35085  | 5.56E-06 | 0.000434         | <b>HOPX</b>      | -2.30755 | 0.001077 | 0.016473         |
| <b>RHOBTB1</b> | 1.036285 | 7.02E-06 | 0.000512         | <b>HSD3B2</b>    | -1.30633 | 0.001157 | 0.0173           |
| <b>SMAP2</b>   | 1.058667 | 7.74E-06 | 0.000545         | <b>LYVE1</b>     | -1.1385  | 0.001413 | 0.019891         |
| <b>MFAP4</b>   | 1.914116 | 9.70E-06 | 0.000642         | <b>PIWIL4</b>    | 1.43009  | 0.001551 | 0.021287         |
| <b>ARRDC3</b>  | 1.15294  | 1.06E-05 | 0.00067          | <b>APOA1</b>     | 1.336305 | 0.00222  | 0.027336         |
| <b>OGN</b>     | 1.082544 | 1.17E-05 | 0.000724         | <b>TMEM63C</b>   | -1.54044 | 0.002254 | 0.02756          |
| <b>PENK</b>    | 1.629169 | 1.17E-05 | 0.000724         | <b>DHRS7C</b>    | -2.04034 | 0.002326 | 0.028077         |
| <b>E2F8</b>    | -1.58732 | 1.50E-05 | 0.000869         | <b>FREM1</b>     | 1.029671 | 0.002638 | 0.030513         |
| <b>METTL7A</b> | 1.011546 | 1.60E-05 | 0.000907         | <b>IL17RB</b>    | -1.62118 | 0.003207 | 0.03473          |
| <b>SUSD5</b>   | 1.423832 | 1.90E-05 | 0.001025         | <b>ELF3</b>      | -1.48394 | 0.003501 | 0.036783         |
| <b>MOG</b>     | -1.43825 | 1.93E-05 | 0.001034         | <b>LRRC17</b>    | 1.34179  | 0.003816 | 0.038956         |
| <b>SELE</b>    | -2.79966 | 2.26E-05 | 0.001163         | <b>VNN1</b>      | 1.286274 | 0.003894 | 0.039491         |

---

|                  |          |          |          |               |          |          |          |
|------------------|----------|----------|----------|---------------|----------|----------|----------|
| <b>CLEC4E</b>    | 1.138034 | 2.38E-05 | 0.001213 | <b>SPC24</b>  | -1.21074 | 0.003952 | 0.039935 |
| <b>SLC16A9</b>   | 1.596653 | 2.55E-05 | 0.001273 | <b>HOOK1</b>  | -1.01436 | 0.004113 | 0.04087  |
| <b>P2RY13</b>    | 2.23529  | 2.60E-05 | 0.001296 | <b>ZNF501</b> | 1.310506 | 0.004157 | 0.041111 |
| <b>NRK</b>       | 1.163113 | 2.75E-05 | 0.001342 | <b>SPINK5</b> | 1.522892 | 0.004197 | 0.041237 |
| <b>LOC285556</b> | -3.54858 | 3.30E-05 | 0.001518 | <b>MGST1</b>  | -1.08969 | 0.004198 | 0.041237 |
| <b>SFRP4</b>     | 1.287447 | 3.33E-05 | 0.001524 | <b>IL7R</b>   | 1.124533 | 0.005226 | 0.047566 |
| <b>FKBP5</b>     | 1.332531 | 3.50E-05 | 0.001567 | <b>STAT4</b>  | 1.771234 | 0.00538  | 0.048455 |

---



**Supplement Table 3: Differentially expressed mRNA (DEMs) in GSE84796.**

| Name      | Log2FC   | P value  | Adjusted P value | Name     | Log2FC   | P value  | Adjusted P value |
|-----------|----------|----------|------------------|----------|----------|----------|------------------|
| IL7R      | 5.635982 | 3.15E-09 | 1.62E-06         | ABCC5    | -1.36661 | 0.000351 | 0.008843         |
| CXCR4     | 3.911759 | 7.91E-09 | 3.04E-06         | MNS1     | 1.954456 | 0.000415 | 0.009731         |
| TSC22D3   | 2.292509 | 2.57E-07 | 4.98E-05         | TMEM63C  | -1.61216 | 0.000426 | 0.009934         |
| LRRC17    | 2.473142 | 3.30E-07 | 6.12E-05         | APOA1    | 2.391861 | 0.000444 | 0.010205         |
| SMAP2     | 1.966806 | 4.77E-07 | 8.15E-05         | MARVELD2 | -1.10775 | 0.000456 | 0.010386         |
| PIWIL4    | 1.61916  | 7.36E-07 | 0.000114         | METTL7A  | 1.543736 | 0.000488 | 0.010798         |
| FRZB      | 2.556612 | 2.54E-06 | 0.0003           | SLCO5A1  | -1.78651 | 0.000525 | 0.011287         |
| MYH6      | -2.29965 | 4.15E-06 | 0.000416         | LPCAT3   | -1.12465 | 0.000538 | 0.011462         |
| GNMT      | -2.6273  | 8.43E-06 | 0.000708         | CFH      | 1.60233  | 0.000541 | 0.011493         |
| CDKN3     | -1.15398 | 8.75E-06 | 0.000723         | HOPX     | -1.88386 | 0.000548 | 0.01156          |
| E2F8      | -2.41694 | 9.41E-06 | 0.000755         | SLC36A4  | -1.21651 | 0.000555 | 0.011634         |
| NRK       | 2.515456 | 1.13E-05 | 0.00086          | NAP1L3   | 3.11391  | 0.000575 | 0.01187          |
| CDCA2     | -2.96466 | 1.31E-05 | 0.000958         | LSAMP    | -2.40812 | 0.000659 | 0.012989         |
| PENK      | 3.323397 | 1.50E-05 | 0.001064         | FAM179A  | -2.52798 | 0.000811 | 0.01473          |
| CA14      | -2.85132 | 1.70E-05 | 0.001185         | P2RY13   | 1.846758 | 0.000904 | 0.015929         |
| SLC16A9   | 2.413273 | 1.90E-05 | 0.001277         | ABRA     | -2.11845 | 0.000943 | 0.016386         |
| FIBIN     | 2.266041 | 3.14E-05 | 0.001804         | VNN1     | 2.114643 | 0.000969 | 0.016688         |
| DDIT4     | 2.007328 | 3.70E-05 | 0.002059         | NR4A3    | -2.98413 | 0.001018 | 0.01724          |
| ARRDC2    | 1.484356 | 5.36E-05 | 0.002613         | GDF10    | 2.393707 | 0.001231 | 0.019109         |
| OMD       | 2.27277  | 5.47E-05 | 0.002648         | PIK3R1   | 1.416809 | 0.001502 | 0.021719         |
| LOC285556 | -5.35357 | 5.99E-05 | 0.002795         | GRIK2    | -1.38296 | 0.00151  | 0.021782         |
| RASL11B   | 2.578283 | 6.08E-05 | 0.002812         | APOBEC2  | -1.00435 | 0.001617 | 0.022744         |
| RRAD      | -2.98332 | 6.37E-05 | 0.002915         | IL17RB   | -1.88626 | 0.001819 | 0.024658         |
| MFAP4     | 1.615272 | 6.83E-05 | 0.003054         | FAM83B   | -1.91393 | 0.001874 | 0.025182         |
| P2RY2     | -1.83146 | 6.84E-05 | 0.003054         | SELE     | -2.72297 | 0.00188  | 0.025201         |
| RHOBTB1   | 1.015542 | 7.60E-05 | 0.003271         | GNLY     | 1.471554 | 0.002006 | 0.02615          |
| C16orf89  | 2.428536 | 9.20E-05 | 0.003736         | FREM1    | 1.349594 | 0.002172 | 0.027431         |
| CHAC2     | -1.00983 | 9.32E-05 | 0.003766         | TUBB2A   | -1.02588 | 0.002176 | 0.027431         |
| ASPN      | 2.018348 | 9.85E-05 | 0.003906         | MRGPRF   | -1.23526 | 0.002232 | 0.027896         |
| MID1IP1   | -1.84265 | 0.000108 | 0.00412          | PTGDR2   | 2.17009  | 0.002319 | 0.028571         |
| LOC283861 | 1.491724 | 0.000111 | 0.004202         | LTBP2    | 2.268639 | 0.002363 | 0.028807         |
| ARRDC3    | 1.563532 | 0.000115 | 0.004301         | FKBP5    | 1.387555 | 0.002433 | 0.029425         |
| MOG       | -1.89065 | 0.00013  | 0.004675         | FCN3     | -1.25279 | 0.002434 | 0.029425         |
| C11orf65  | 1.254249 | 0.000133 | 0.004718         | ELF3     | -5.24328 | 0.002483 | 0.029816         |
| SUSD5     | 1.394496 | 0.000147 | 0.005073         | HSD3B2   | -1.23709 | 0.002709 | 0.031468         |
| ADRB1     | -1.14128 | 0.000151 | 0.005144         | S1PR3    | -1.03052 | 0.003538 | 0.037325         |
| SPINK5    | 1.735013 | 0.000162 | 0.005393         | STAT4    | 1.526018 | 0.003578 | 0.037594         |
| HOOK1     | -1.4461  | 0.000167 | 0.00549          | FAM167B  | -1.28167 | 0.003648 | 0.038191         |
| SPC24     | -1.11409 | 0.000186 | 0.005955         | MAMDC2   | 1.150447 | 0.003689 | 0.038332         |

---

|               |          |          |          |                |          |          |          |
|---------------|----------|----------|----------|----------------|----------|----------|----------|
| <b>SFRP4</b>  | 3.059419 | 0.000192 | 0.006093 | <b>CHRD1</b>   | 2.075609 | 0.003945 | 0.04003  |
| <b>KCNJ5</b>  | -1.51961 | 0.000202 | 0.006243 | <b>MGST1</b>   | -1.72341 | 0.004164 | 0.041379 |
| <b>OGN</b>    | 2.542026 | 0.000213 | 0.006456 | <b>DHRS7C</b>  | -3.1977  | 0.004269 | 0.041946 |
| <b>ZMAT1</b>  | 1.446776 | 0.000251 | 0.007323 | <b>LYVE1</b>   | -1.50501 | 0.004496 | 0.043411 |
| <b>LMO3</b>   | 2.402987 | 0.000252 | 0.007323 | <b>LPP-AS2</b> | 1.332697 | 0.004954 | 0.046076 |
| <b>CLEC4E</b> | 1.838103 | 0.000309 | 0.008214 | <b>PRRT2</b>   | 1.132146 | 0.005399 | 0.04848  |
| <b>ZNF501</b> | 1.535873 | 0.000324 | 0.008472 | <b>S100A3</b>  | -2.12417 | 0.005435 | 0.04874  |

---
